# Supplementary material for: Subtle Changes in Motif Positioning Cause Tissue-Specific Effects on Robustness of an Enhancer's Activity
Source: PLOS journal article supplement (doi:10.1371/journal.pgen.1004060), 2014-01-02
Supplement: S3 (10.1371/journal.pgen.1004060.s003) [file journal.pgen.1004060.s003]

| Name                 |         | Synthetic CRM | Gene expression             | merge          | Schematic representation |
|----------------------|---------|---------------|-----------------------------|----------------|--------------------------|
| Stage 11             | pMad 6x | <b>A</b><br>  | <b>A'</b><br><br><i>dpp</i> | <b>A''</b><br> | <b>A'''</b><br>          |
|                      | pMad 4x | <b>B</b><br>  | <b>B'</b><br><br><i>dpp</i> | <b>B''</b><br> | <b>B'''</b><br>          |
|                      | pMad 2x | <b>C</b><br>  | <b>C'</b><br><br><i>dpp</i> | <b>C''</b><br> | <b>C'''</b><br>          |
| Stage 14             | pMad 6x | <b>D</b><br>  | <b>D'</b><br><br><i>tin</i> | <b>D''</b><br> | <b>D'''</b><br>          |
| Legend for TF motifs |         |               |                             |                |                          |
